# Supplementary material for: Quantum Inspired Polarization Decoherence as an Optical Signature of Water Impurities
Source: Research Square preprint supplement (doi:10.21203/rs.3.rs-8687931/v1), 2026-01-29
Supplement: Supplementary file 1 [file 2b870a969fa7645847c473e2.docx]

**Table 3** Measurement probabilities and sensor contrast information for different water samples

| **Sample** | **Strength of depolarization**  **(no unit)** | **Bloch Vector** | **Probability (+)** | **Probability (-)** | **Sensor Implication** |
| --- | --- | --- | --- | --- | --- |
| RO | 0.07 | (0.93, 0, 0) | 0.965  (96.50%) | 0.035  (3.50%) | High contrast |
| Tap | 0.14 | (0.86, 0, 0) | 0.93  (93.00%) | 0.07  (7.00%) | Moderate contrast |
| Sea | 0.39 | (0.61, 0, 0) | 0.805  (80.50%) | 0.195  (19.50%) | Low contrast |
| Canal | 0.49 | (0.51, 0, 0) | 0.755  (75.50%) | 0.245  (24.50%) | Very low contrast |
