# Supplementary material for: Quantum Inspired Polarization Decoherence as an Optical Signature of Water Impurities
Source: Research Square preprint supplement (doi:10.21203/rs.3.rs-8687931/v1), 2026-01-29
Supplement: Supplementary file 2 [file 54e3ed3b38283c5c1481956e.docx]

**Table 1** Summary of experimentally measured and derived polarization parameters for different water samples

| **Sample** | **Averaged Transmitted LightIntensity**  **(lux)** | **PDI**    **(no unit)** | **Classical Interpretation** | **Strength of depolarization**  **(no unit)** | **Quantum Interpretation** | **Bloch Vector** |
| --- | --- | --- | --- | --- | --- | --- |
| RO | 41.71 | 0.93 | Almost polarized | 0.07 | Pure state | (0.93, 0, 0) |
| Tap | 38.53 | 0.86 | Slight depolarization | 0.14 | Weakly mixed state | (0.86, 0, 0) |
| Sea | 27.59 | 0.61 | Partial polarization | 0.39 | Mixed state | (0.61, 0, 0) |
| Canal | 22.83 | 0.51 | Strong depolarization | 0.49 | Highly mixed state | (0.51, 0, 0) |
