# Supplementary material for: Quantum Inspired Polarization Decoherence as an Optical Signature of Water Impurities
Source: Research Square preprint supplement (doi:10.21203/rs.3.rs-8687931/v1), 2026-01-29
Supplement: Supplementary file 3 [file ef59db116f7a1aad1677407f.docx]

**Table 2** Mapping of polarization state evolution to quantum operations and measurement outcomes

| **State Evolution** | **Measurement** | **Outcome** |
| --- | --- | --- |
| Initial State |  | Standard computational basis state |
| Hadamard Gate (H) |  |  |
| Depolarizing Channel |  |  |
| Measurement in the basis |  |  |
|  |  |
